# Supplementary material for: NIR-II photothermal conversion and imaging based on a cocrystal containing twisted components
Source: Royal Society of Chemistry journal article supplement (doi:10.1039/d3sc03532h), 2023-11-28
Supplement: d3sc03532h1.pdf [file d3sc03532h1.pdf]

# Supporting Information

## NIR-II Photothermal Conversion and Imaging Based on a Cocrystal containing Twisted Components

Tao Li,<sup>a,b</sup> Jia-Chuan Liu,<sup>a</sup> En-Ping Liu,<sup>c</sup> Bai-Tong Liu,<sup>d</sup> Jing-Yu Wang,<sup>a</sup> Pei-Yu Liao,<sup>a</sup> Jian-Hua Jia,<sup>a</sup>  
Yuanning Feng,<sup>\*,b</sup> and Ming-Liang Tong<sup>\*,a</sup>

*a* Key Laboratory of Bioinorganic and Synthetic Chemistry of Ministry of Education, School of Chemistry, Institute of Green Chemistry and Molecular Engineering, Sun Yat-Sen University, Guangzhou, Guangdong 510006, China

*b* Department of Chemistry and Biochemistry, University of Oklahoma, 101 Stephenson Parkway, Norman, Oklahoma 73019, United States

*c* School of Materials Science and Engineering, Tianjin University, Tianjin 300072, China

*d* Department of Chemistry, Northwestern University, 2145 Sheridan Road, Evanston, Illinois 60208, United States

\*E-mail: [tongml@mail.sysu.edu.cn](mailto:tongml@mail.sysu.edu.cn); [yf@ou.edu](mailto:yf@ou.edu)

## Table of Content

|                                                            |            |
|------------------------------------------------------------|------------|
| <b>1. General Information</b> .....                        | <b>S2</b>  |
| <b>2. Experimental Section</b> .....                       | <b>S2</b>  |
| <b>3. (Super)structural Determination</b> .....            | <b>S3</b>  |
| <b>4. Physical Characterization</b> .....                  | <b>S6</b>  |
| <b>5. Theoretical Calculation</b> .....                    | <b>S8</b>  |
| <b>6. NIR-II Photothermal Conversion Measurement</b> ..... | <b>S10</b> |
| <b>7. References</b> .....                                 | <b>S17</b> |

## 1. General Information

Unless otherwise mentioned, all reagents and solvents were purchased from commercial sources and used as received without further purification.

The C, H, and N elemental analyses were carried out using an Elementar Vario-EL CHNS elemental analyzer. Thermogravimetric analysis was carried out on a TG-209/Vector-2 thermogravimetric analyzer 2, and the dried crystalline samples were heated at a rate of 5 up to 800 °C per minute and then cooled to room temperature under N<sub>2</sub> atmosphere. Powder X-ray diffraction (PXRD) patterns were performed on a Rigaku Smartlab X-Ray diffractometer with Cu-K $\alpha$  ( $\lambda = 1.54178 \text{ \AA}$ ) radiation. UV-Vis-NIR diffuse reflectance spectra (DRS) were recorded using a UV-Vis spectrophotometer (Shimadzu UV-3600Plus) equipped with an integrating sphere, and BaSO<sub>4</sub> powder was used as the reference for the baseline correction. Electron paramagnetic resonance (EPR) data were collected in the X-band at room temperature on a Bruker A300 spectrometer. The solid-state fluorescent spectra were measured on an Edinburgh FLS-980 Fluorescence spectrometer equipped with a visible photomultiplier tube (PMT) and a NIR PMT upon excitation with a continuous Xenon lamp. X-Ray photoelectron spectroscopy (XPS) measurements were performed on a Thermo Fisher Scientific ESCALAB Xi+ system with an Al K $\alpha$  source. Sequential XPS spectra were recorded by scanning the electron analyzer from 100 to 75 eV in 0.05 eV increments under 20.0 eV pass energy. Time-resolved optical spectroscopy: the femtosecond transient absorption (fs-TA) spectra were recorded on a Helios Fire spectrometer (Ultrafast System). The excitation pulse (400 nm, 25  $\mu$ W) is a regeneratively amplified Ti: Sapphire laser source (Coherent Legend, 800 nm, 150 fs, 5 mJ per pulse, and 1 kHz repetition rate). Fs-TA data were background- and chirp-corrected using Surface Explorer 4.5 (Ultrafast Systems, LLC) and then analyzed in MATLAB using previously reported methods. The data at selected wavelengths were globally fit to the solution of a sequential three-site model convoluted with a 0.3 ps Gaussian instrument response function. The resulting time-dependent populations were then used to derive the evolution-associated spectra.

## 2. Experimental Section

**Cocrystal Preparation.** 1,6,7,8-Tetrachloro-3,4,9,10-perylenetetracarboxylic dianhydride (TCPDA, 40 mg) was dissolved in 20 mL THF using ultrasonication and heat. Above supernatant (1 mL) was added to a 20-mL vial containing 10 mg of tetrathiafulvalene (TTF). The mixture was treated by ultrasonication for 5 min, given rise to a pellucid dark red solution. After loosening silicone-lined cap and evaporating THF slowly at room temperature for one day, dark needle-like single crystals was appeared (**Figure S1**) as the TTF-TCPDA cocrystal (6.1 mg, 61% yield), which was chosen for single-crystal X-ray diffraction analysis.

**Photothermal Measurement.** The TTF-TCPDA crystalline powder (30 mg) was spread on a quartz slide at a distance of 0.7 cm from the 1064 nm laser (Beijing Sitong Boyuan Laser Technology Co., Ltd, Beijing, China). The laser intensity was adjusted from 0.1 to 0.5 W $\cdot$ cm<sup>-2</sup>. The temperature changes during the light irradiation were recorded by an infrared camera (Ti450, Fluke) and infrared photos recording real-time temperatures were extracted from the video by data statistics.

**Electrochemistry Measurement.** A CH instruments electrochemistry workstation (CHI660A) was used for electrochemistry experiments. We used a platinum wire as the counter electrode, glassy carbon as the working electrode, and 0.1 mol/L silver ion MeCN standard solution as the reference electrode for three electrode pulse voltammetry experiments. TTF, TCPDA, and TTF-TCPDA were dissolved in 15 mL of THF and 5 mL of MeCN to obtain 0.01 mmol solutions, respective. The scan rates were set at 30, 50 and 70 mV/s, respectively.

### 3. (Super)structural Determination

Single-crystal X-ray diffraction data of TTF–TCPDA were collected at room temperature on a Hybrid Pixel Array detector equipped with Ga-K $\alpha$  radiation ( $\lambda = 1.3405 \text{ \AA}$ ). Crystallographic data of crystal TCPDA was collected on Bruker D8 diffractometer with graphite-monochromatic Cu-K $\alpha$  radiation ( $\lambda = 1.54184 \text{ \AA}$ ) at room temperature. (Super)structures were solved by direct method and refined using Olex 2 integrated with the SHELXL-2016 software package.

**Table.S1** Crystal data and (super)structures refinement results

| Compound                                       | TTF–TCPDA                                                                     | TCPDA                                                               |
|------------------------------------------------|-------------------------------------------------------------------------------|---------------------------------------------------------------------|
| CCDC Number                                    | 2219621                                                                       | 2219622                                                             |
| Empirical formula                              | C <sub>40</sub> H <sub>20</sub> Cl <sub>4</sub> O <sub>7</sub> S <sub>8</sub> | C <sub>24</sub> H <sub>4</sub> Cl <sub>4</sub> O <sub>6</sub>       |
| Formula weight                                 | 1010.84                                                                       | 530.07                                                              |
| Temperature/K                                  | 298                                                                           | 293                                                                 |
| Crystal system                                 | orthorhombic                                                                  | monoclinic                                                          |
| Space group                                    | <i>P</i> 2 <sub>1</sub> 2 <sub>1</sub> 2                                      | <i>P</i> 2 <sub>1</sub> / <i>n</i>                                  |
| <i>a</i> / $\text{\AA}$                        | 17.9065(3)                                                                    | 13.15240(16)                                                        |
| <i>b</i> / $\text{\AA}$                        | 15.4002(3)                                                                    | 10.75525(12)                                                        |
| <i>c</i> / $\text{\AA}$                        | 7.39430(10)                                                                   | 14.18556(17)                                                        |
| $\alpha$ / $^\circ$                            | 90                                                                            | 90                                                                  |
| $\beta$ / $^\circ$                             | 90                                                                            | 111.4740(14)                                                        |
| $\gamma$ / $^\circ$                            | 90                                                                            | 90                                                                  |
| <i>V</i> / $\text{\AA}^3$                      | 2039.08(6)                                                                    | 1867.36(4)                                                          |
| <i>Z</i>                                       | 2                                                                             | 4                                                                   |
| $\rho_{\text{calc}}$ /g cm <sup>-3</sup>       | 1.646                                                                         | 1.885                                                               |
| $\mu$ /mm <sup>-1</sup>                        | 4.531                                                                         | 6.2                                                                 |
| F(000)                                         | 1024.0                                                                        | 1056                                                                |
| Radiation                                      | GaK $\alpha$ ( $\lambda = 1.3405$ )                                           | CuK $\alpha$ ( $\lambda = 1.54184$ )                                |
| 2 $\theta$ range for data collection/ $^\circ$ | 6.582 to 121.836                                                              | 7.85 to 143.03                                                      |
| Index range                                    | $-23 \leq h \leq 22$<br>$-20 \leq k \leq 20$<br>$-9 \leq l \leq 9$            | $-16 \leq h \leq 15$<br>$-8 \leq k \leq 13$<br>$-11 \leq l \leq 17$ |
| Reflections collected                          | 59114                                                                         | 7003                                                                |
| Independent reflection                         | 4692 [ $R_{\text{int}} = 0.0695$ ,<br>$R_{\text{sigma}} = 0.0204$ ]           | 3560 [ $R_{\text{int}} = 0.0241$ ,<br>$R_{\text{sigma}} = 0.0324$ ] |
| Data/restraint/parameter                       | 4692/0/267                                                                    | 3560/0/317                                                          |
| Goodness-of-fit on F <sup>2</sup>              | 1.070                                                                         | 1.048                                                               |
| Final R index [ $I \geq 2\sigma(I)$ ]          | $R_1 = 0.0555$ , $wR_2 = 0.1774$                                              | $R_1 = 0.0327$ , $wR_2 = 0.0873$                                    |
| Final R index [all data]                       | $R_1 = 0.0592$ , $wR_2 = 0.1827$                                              | $R_1 = 0.0350$ , $wR_2 = 0.0896$                                    |
| Largest diff. peak/hole / e $\text{\AA}^{-3}$  | 0.54/−0.54                                                                    | 0.79/−0.42                                                          |

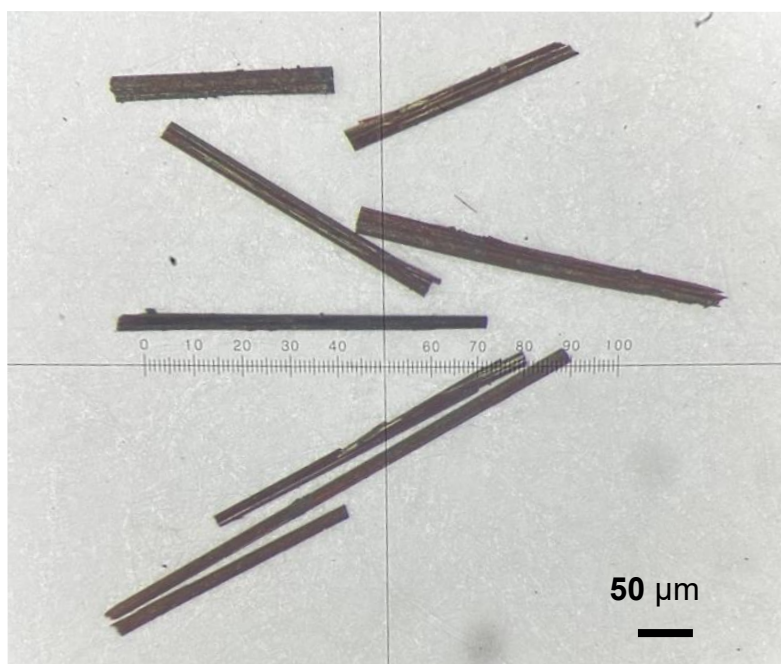

**Figure S1.** Optical micrograph of TTF–TCPDA showing its needle-like cocrystals

|       |      |
|-------|------|
| C1-C4 | 1.34 |
| S1-C1 | 1.75 |
| S2-C1 | 1.75 |
| S1-C3 | 1.73 |
| S2-C2 | 1.73 |
| C2-C3 | 1.30 |
| S3-C4 | 1.75 |
| S4-C4 | 1.75 |
| S3-C6 | 1.73 |
| S4-C5 | 1.73 |
| C5-C6 | 1.30 |

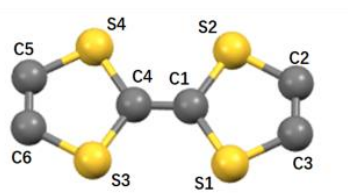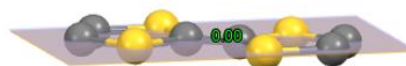

**Scheme S1.** Selected structural parameters for TTF<sup>1</sup> alone

|       |      |
|-------|------|
| C1-C4 | 1.32 |
| S1-C1 | 1.75 |
| S2-C1 | 1.76 |
| S1-C3 | 1.74 |
| S2-C2 | 1.71 |
| C2-C3 | 1.27 |
| S3-C4 | 1.74 |
| S4-C4 | 1.76 |
| S3-C6 | 1.81 |
| S4-C5 | 1.51 |
| C5-C6 | 1.36 |

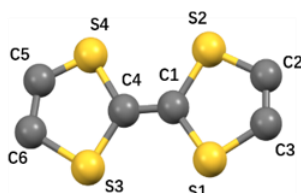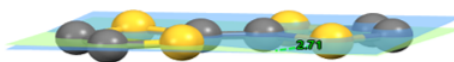

**Scheme S2.** Selected structural parameters for TTF component in TTF–TCPDA cocrystals

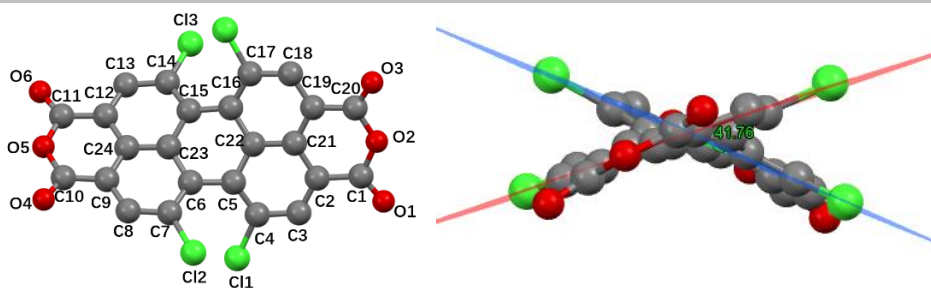

|         |       |         |       |         |       |         |       |
|---------|-------|---------|-------|---------|-------|---------|-------|
| C1-C2   | 1.481 | C12-C13 | 1.377 | C6-C23  | 1.433 | O2-C20  | 1.382 |
| C2-C3   | 1.366 | C13-C14 | 1.404 | C9-C24  | 1.411 | O3-C20  | 1.185 |
| C3-C4   | 1.408 | C14-C15 | 1.398 | C12-C24 | 1.413 | O4-C10  | 1.197 |
| C4-C5   | 1.395 | C15-C16 | 1.472 | C15-C23 | 1.429 | O5-C10  | 1.391 |
| C5-C6   | 1.471 | C16-C17 | 1.399 | C16-C22 | 1.429 | O5-C11  | 1.393 |
| C6-C7   | 1.393 | C17-C18 | 1.407 | C19-C21 | 1.407 | O6-C11  | 1.193 |
| C7-C8   | 1.406 | C18-C19 | 1.378 | C21-C22 | 1.412 | C11-C4  | 1.723 |
| C8-C9   | 1.379 | C19-C20 | 1.482 | C23-C24 | 1.409 | C12-C7  | 1.724 |
| C9-C10  | 1.468 | C2-C21  | 1.414 | O1-C1   | 1.191 | C13-C14 | 1.724 |
| C11-C12 | 1.473 | C5-C22  | 1.431 | O2-C1   | 1.390 | C14-C17 | 1.725 |

**Scheme S3.** Selected structural parameters for TCPDA alone

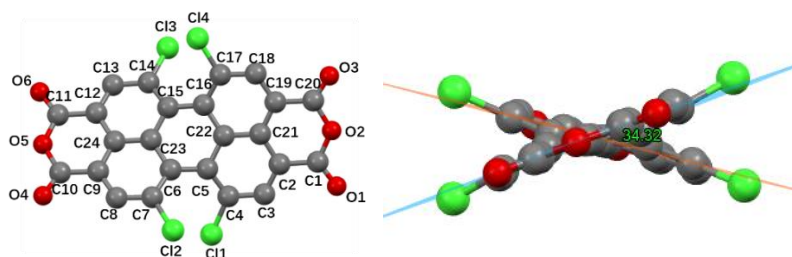

|         |       |         |       |         |       |         |       |
|---------|-------|---------|-------|---------|-------|---------|-------|
| C1-C2   | 1.492 | C12-C13 | 1.356 | C6-C23  | 1.426 | O2-C20  | 1.384 |
| C2-C3   | 1.356 | C13-C14 | 1.398 | C9-C24  | 1.404 | O3-C20  | 1.174 |
| C3-C4   | 1.398 | C14-C15 | 1.394 | C12-C24 | 1.407 | O4-C10  | 1.174 |
| C4-C5   | 1.394 | C15-C16 | 1.451 | C15-C23 | 1.437 | O5-C10  | 1.384 |
| C5-C6   | 1.451 | C16-C17 | 1.414 | C16-C22 | 1.426 | O5-C11  | 1.361 |
| C6-C7   | 1.414 | C17-C18 | 1.387 | C19-C21 | 1.404 | O6-C11  | 1.205 |
| C7-C8   | 1.387 | C18-C19 | 1.365 | C21-C22 | 1.414 | C11-C4  | 1.733 |
| C8-C9   | 1.365 | C19-C20 | 1.477 | C23-C24 | 1.414 | C12-C7  | 1.725 |
| C9-C10  | 1.477 | C2-C21  | 1.407 | O1-C1   | 1.208 | C13-C14 | 1.733 |
| C11-C12 | 1.492 | C5-C22  | 1.437 | O2-C1   | 1.361 | C14-C17 | 1.725 |

**Scheme S4.** Selected structural parameters for TCPDA component in TTF-TCPDA cocrystals

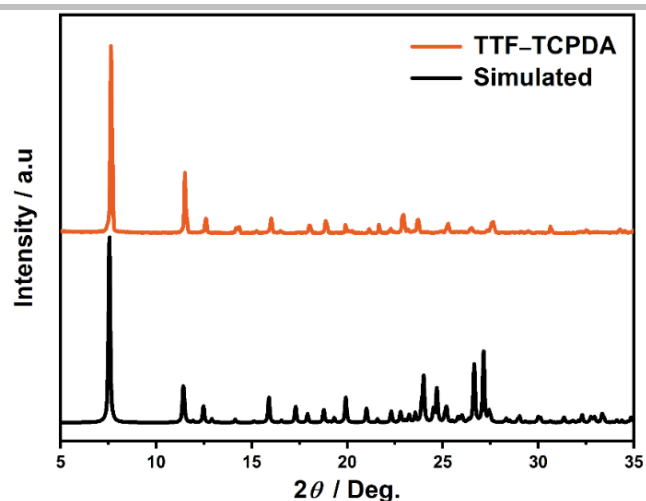

**Figure S2.** PXRD Patterns of the synthetic (orange) and simulated (black) TTF–TCPDA cocrystals

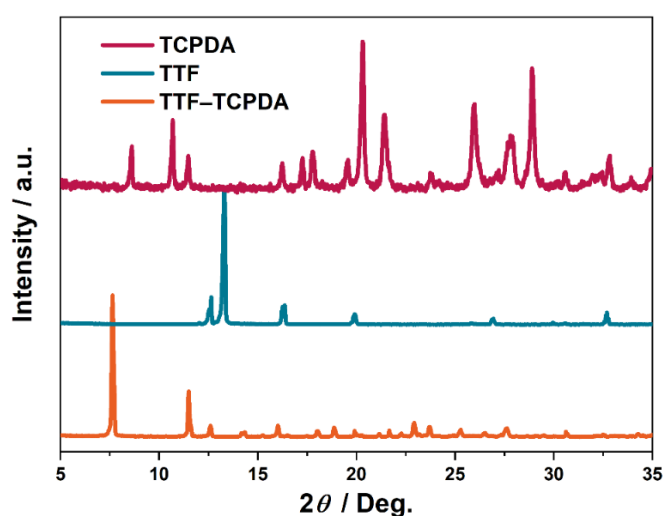

**Figure S3.** PXRD Patterns of synthetic TTF (blue), TCPDA (red) and TTF–TCPDA (orange) (co)crystals

#### 4. Physical Characterization

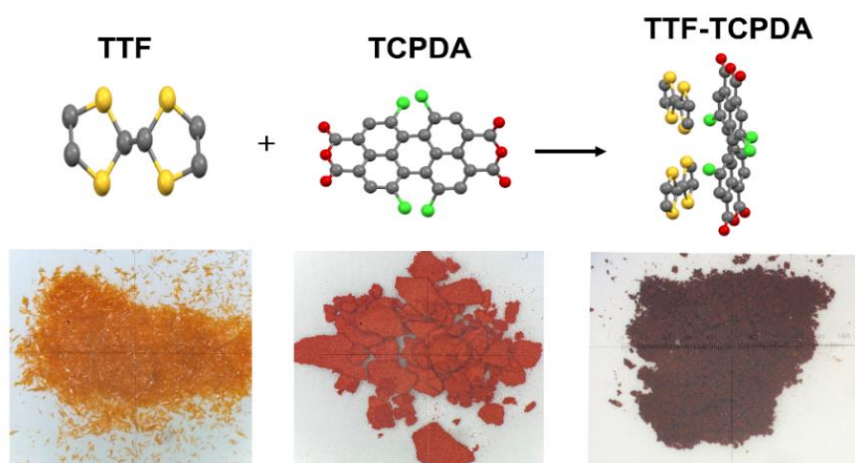

**Figure S4.** Stick-and-ball representations of the (super)structures of TTF, TCPDA and TTF–TCPDA (top) and photographs of their powders (bottom)

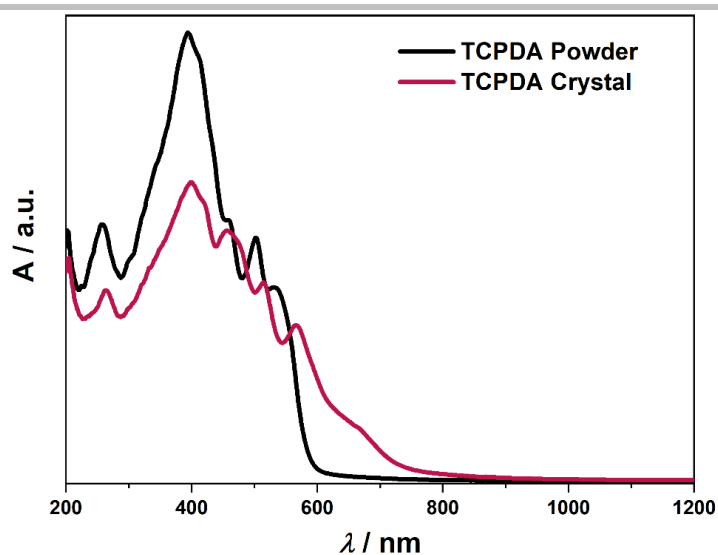

**Figure S5.** Overlaid UV-Vis-NIR diffuse reflectance spectra of TCPDA powder (black) and crystal (red)

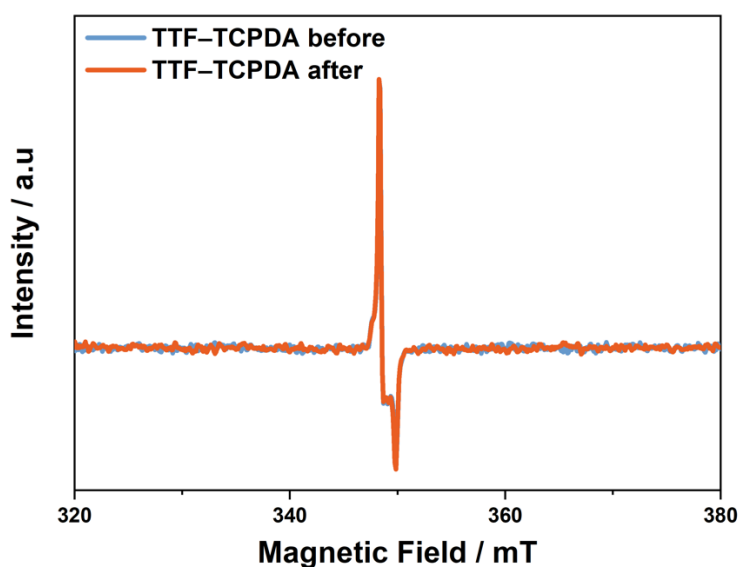

**Figure S6.** Overlaid EPR spectra of TTF-TCPDA radical before (blue) and after (orange) the light irradiation for 10 min at room temperature

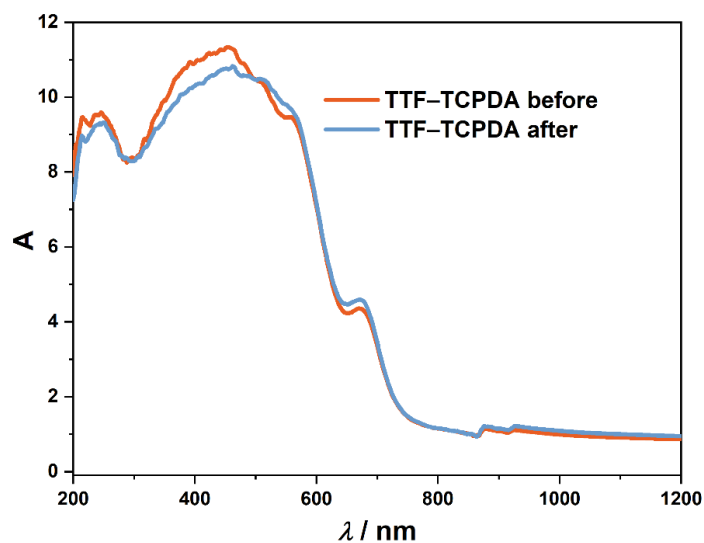

**Figure S7.** Overlaid UV-Vis-NIR diffuse reflectance spectra of TTF-TCPDA before (orange) and after (blue) the light irradiation for 10 min at room temperature

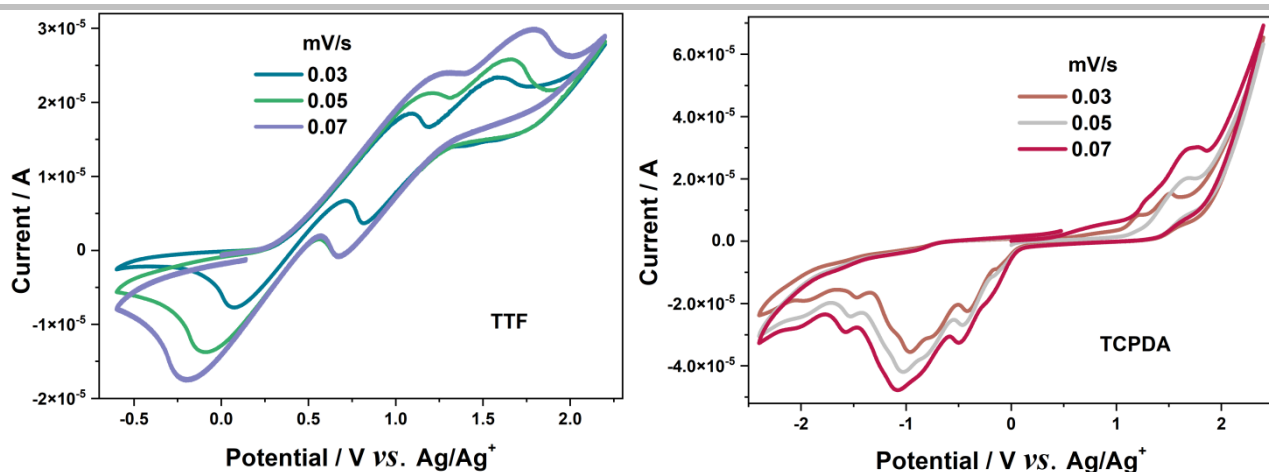

**Figure S8.** Overlaid cyclic voltammetry graphs of TTF (left) and TCPDA (right) at scan rates of 0.03, 0.05 and 0.07 mV/s, respectively

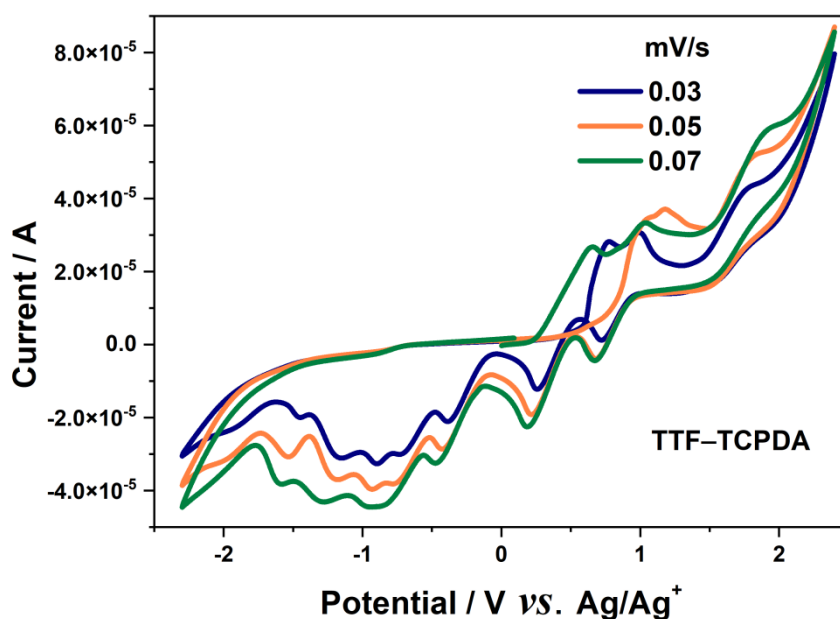

**Figure S9.** Overlaid cyclic voltammetry graph of TTF-TCPDA at scan rates of 0.03, 0.05 and 0.07 mV/s, respectively

## 5. Theoretical Calculation

The B3LYP functional<sup>2</sup> and 6-311+G\*\* basis set were employed in this article to perform orbital and spin characteristic calculations, while UB3LYP functional was used in time-dependent density functional theory (TD-DFT) calculations. DFT-D3 (BJ) correction<sup>3</sup> was taken into account. (Super)structures used in all the calculation except IRC mission were derived from single-crystal X-ray diffraction data. When calculating the interaction energy ( $\Delta E_{\text{int}}$ ) between TTF and TCPDA components, the basis set superposition error<sup>4</sup> (BSSE) was included in the calculation. The B3LYP functional and def2-SVP basis set were used in optimization and intrinsic reaction coordinate mission. The Gaussian 09 package<sup>5</sup> was used for all of the calculation. Multiwfn software<sup>6</sup> was used to analyze wavefunction data produced by Gaussian. Visual molecular dynamics software<sup>7</sup> was used to visualize calculation results.



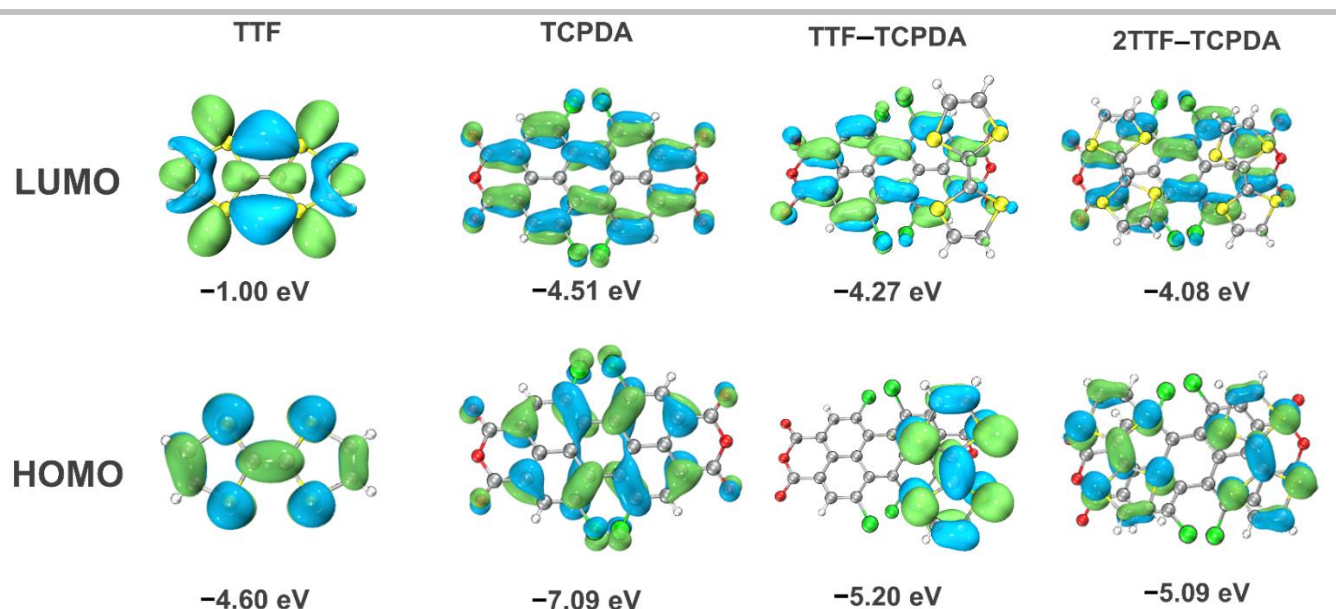

**Figure S10.** Frontier molecular orbitals of TTF, TCPDA, TTF-TCPDA and 2TTF-TCPDA in the TTF-TCPDA cocrystal, respectively

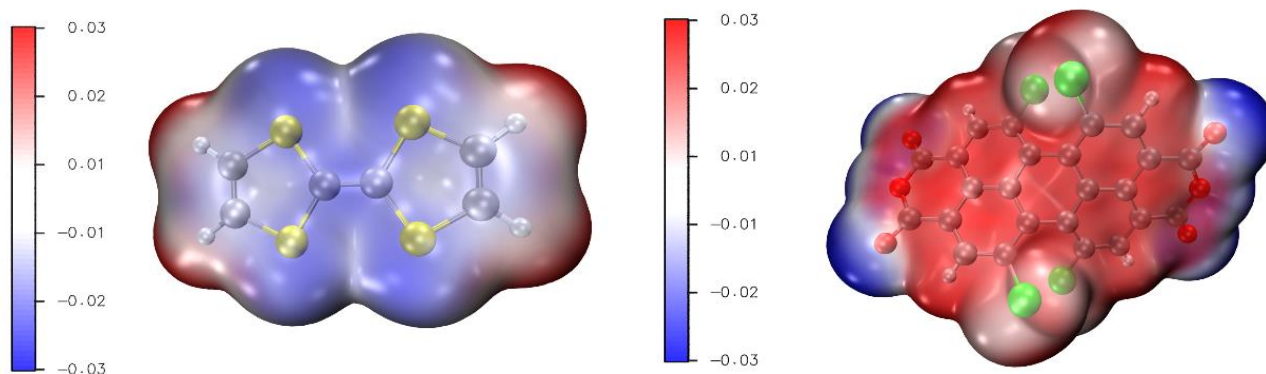

**Figure S11.** Electrostatic potential (ESP) analyses of TTF (left) and TCPDA (right)

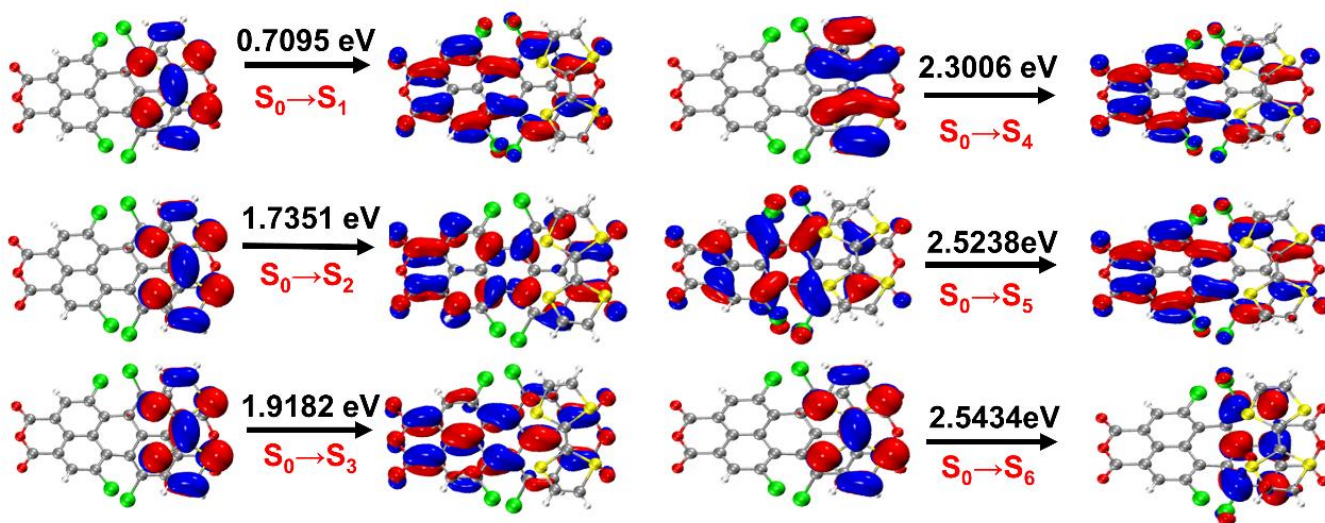

**Figure S12.** Natural transition orbitals<sup>8</sup> of  $S_0$  to singlet excited states on a D-A dimer from infinite D-A stacking

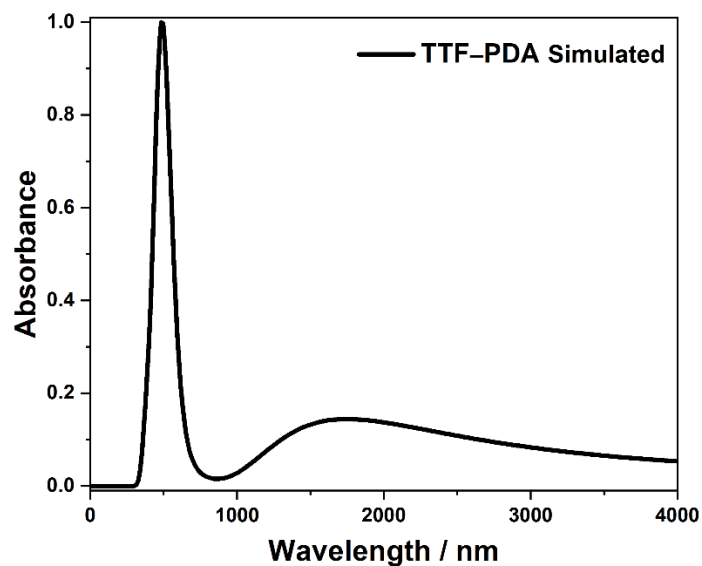

**Figure S13.** Calculated absorption spectra of TTF-TCPDA using TD-DFT method

**Table S2.** TD-DFT Calculations at UB3LYP/6-311+G\*\* D3 (BJ)level for the transition from  $S_0$  to the first six excited states of the D-A dimer in TTF-TCPDA

| Excited state  | Calculated $\lambda$ / nm | Oscillator strength | Energy of transition / eV |
|----------------|---------------------------|---------------------|---------------------------|
| S <sub>1</sub> | 1747.5                    | 0.0894              | 0.7095                    |
| S <sub>2</sub> | 714.58                    | 0.0072              | 1.7351                    |
| S <sub>3</sub> | 646.34                    | 0.0068              | 1.9182                    |
| S <sub>4</sub> | 538.92                    | 0.0214              | 2.3006                    |
| S <sub>5</sub> | 491.25                    | 0.4210              | 2.5238                    |
| S <sub>6</sub> | 487.48                    | 0.1701              | 2.5434                    |

## 6. NIR-II Photothermal Conversion Measurement

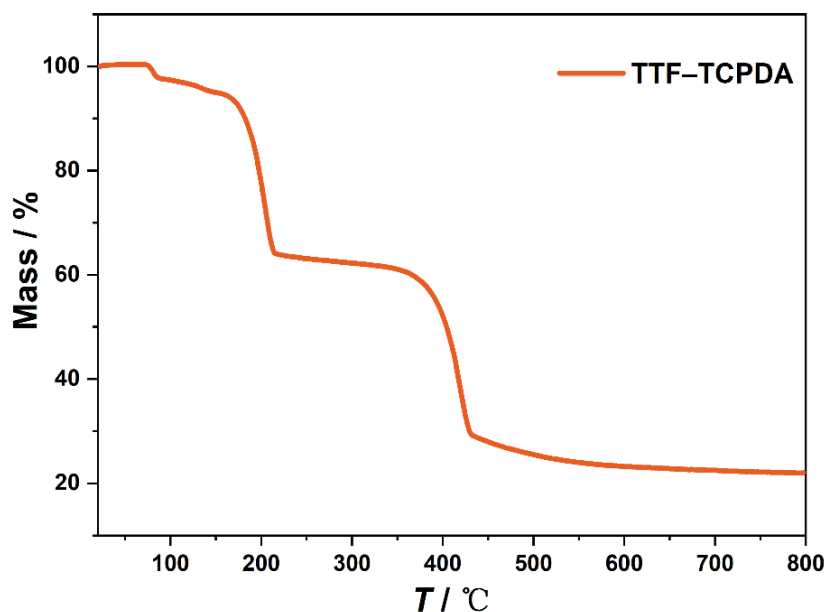

**Figure S14.** TGA Curves of as-synthesized TTF-TCPDA showing it is thermally stable lower than 175 °C

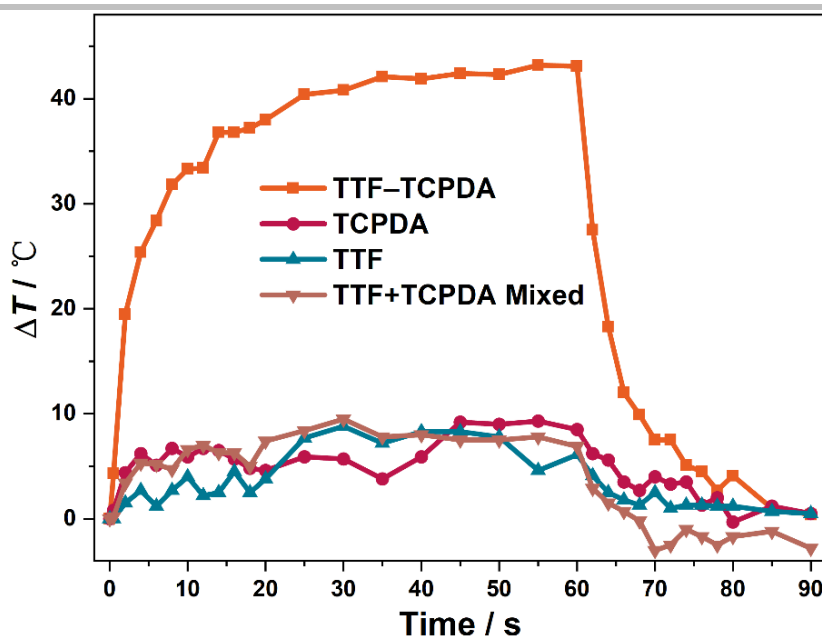

**Figure S15.** Overlaid photothermal conversion curves of TTF (orange), TCPDA (blue), TTF+TCPDA mixture (cyan), and TTF-TCPDA cocrystal (brown) under a 1064 nm laser ( $0.1 \text{ W}\cdot\text{cm}^{-2}$ ) irradiation

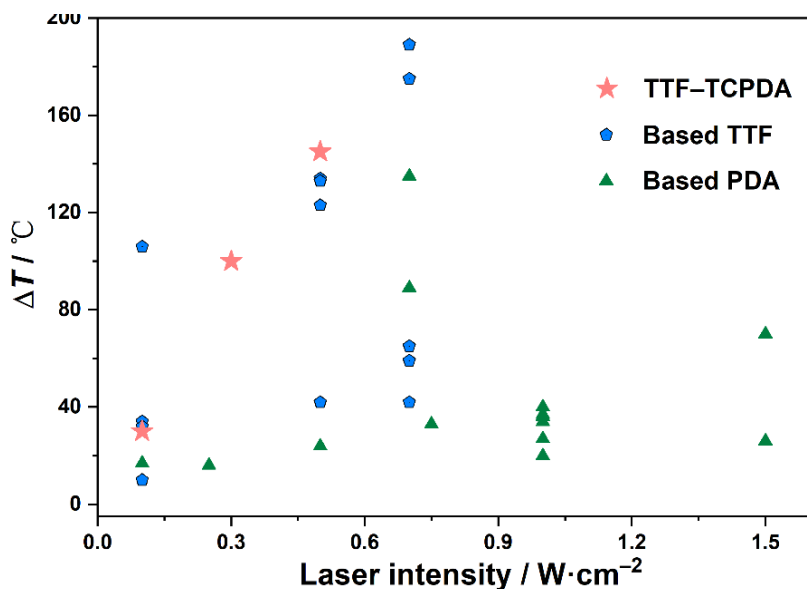

**Figure S16.** Temperature increase ( $\Delta T$ ) corresponding to the laser intensity of various TTF- and PDA-based photothermal materials illuminated by 660, 808 or 980 nm laser

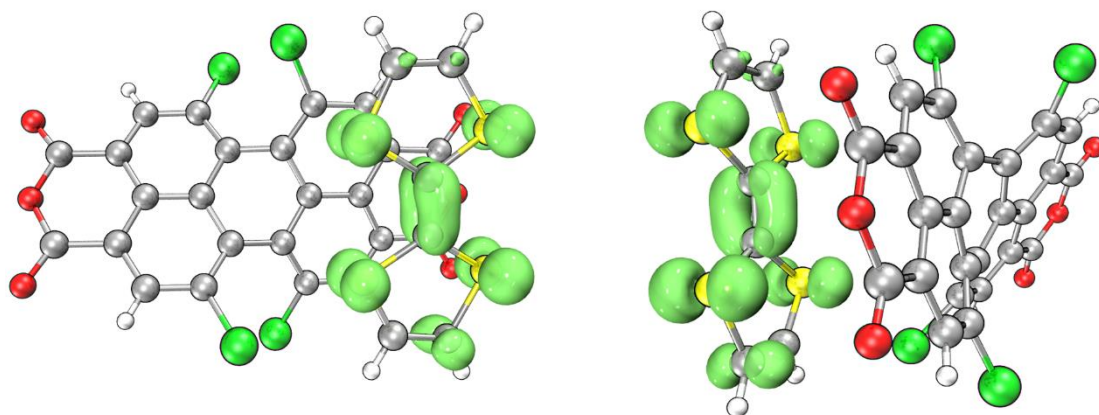

**Figure S17.** Calculated spin density distribution of TTF-TCPDA at the B3LYP/6-311+G\*\* D3 (BJ) level

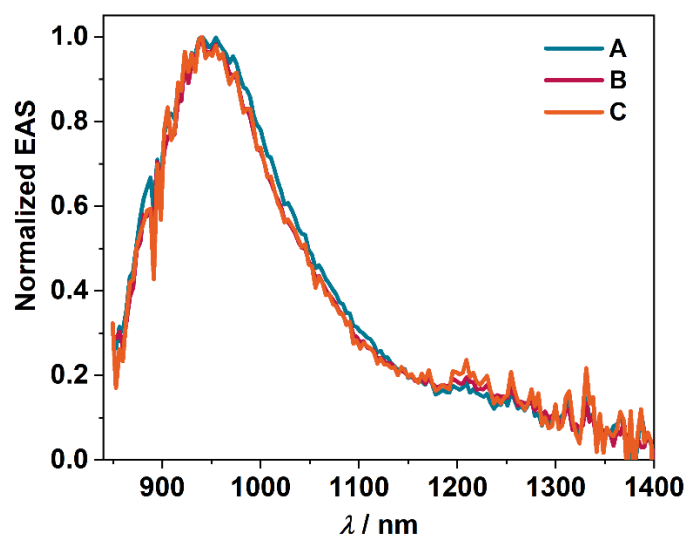

**Figure S18.** Normalized evolution-associated spectra.

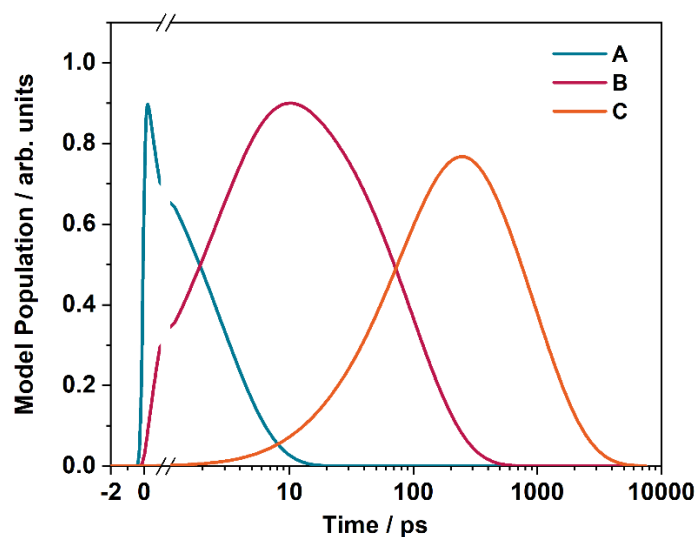

**Figure S19.** Model populations from kinetic analysis.

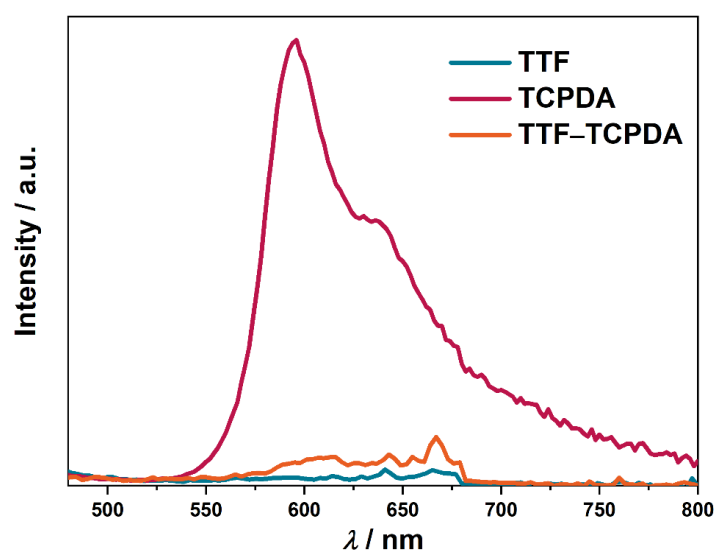

**Figure S20.** Solid-state fluorescence emission spectra ( $\lambda_{\text{ex}} = 360$  nm) of TTF, TCPDA, and TTF-TCPDA at room temperature.

**Photothermal conversion efficiency ( $\eta$ ):** The accurate photothermal conversion efficiency ( $\eta$ ) of these materials was calculated according to a previously described method<sup>9</sup>. In general, each powdery sample was suspended in a 2-mL solution of THF (10 mg/mL) at room temperature (26 °C). The mixture was irradiated (1064 nm, 0.3 W·cm<sup>-2</sup>) for 10 min. Then the laser was shut off to allow the system to cool down to room temperature naturally. Both the temperature-rising and cooling processes were recorded by an IR thermal camera. In addition, the absorbances of the three times diluted suspensions at 1064 nm were measured as 0.62. Detailed calculation methods are shown as follows:

The  $\eta$  can be defined as the fraction of absorbed light energy that is converted to thermal energy, as shown in the following equation:

$$\eta = \frac{hs(\Delta T_{\text{material}} - \Delta T_{\text{solvent}})}{I(1 - 10^{-A})}$$

### Supplementary Equation 1

Herein,  $I$  is the laser power (0.3 mW, 1 cm<sup>2</sup>);  $A$  is the absorbance of suspension at the wavelength of 1064 nm;  $\Delta T_{\text{material}}$  and  $\Delta T_{\text{solvent}}$  represent the temperature changes of the test sample and blank sample, respectively;  $h$  is the heat transfer coefficient, and  $s$  is the surface area of the container, which are determined from the following equation:

$$hs = \frac{mc}{\tau_s}$$

### Supplementary Equation 2

$m$  is the mass of the solvent (the density of THF is 0.89 g·mL<sup>-1</sup> so  $m = 2 \times 0.89 = 1.78$  g);  $c$  is the specific heat capacity of the solvent THF (1.96 J·mol<sup>-1</sup>·°C<sup>-1</sup>); and  $\tau_s$  is a time constant, which can be determined in cooling periods from the following equation:

$$t = -\tau_s \ln(\theta)$$

### Supplementary Equation 3

$\theta$  is a time-dependent dimensionless parameter known as the driving force temperature, which is defined as follows:

$$\theta = \frac{T - T_{\text{Surr}}}{T_{\text{Max}} - T_{\text{Surr}}}$$

### Supplementary Equation 4

$T_{\text{Max}}$  (34 °C) and  $T_{\text{Surr}}$  (26 °C) are the maximum steady-state temperature and the environmental temperature, respectively.

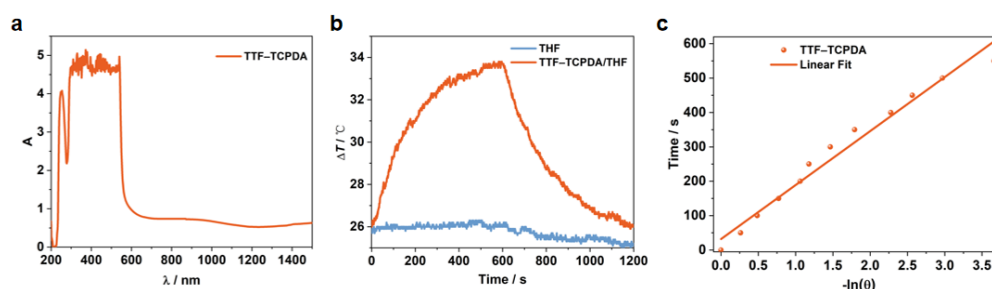

**Figure S19.** (a) Photothermal conversion curves of THF and TTF-TCPDA in THF and (b) the plot of time versus  $-\ln(\theta)$  from the data recorded during the cooling period.

We are able to get the  $hs = 1.78 \times 1.96 / 157 = 0.0222$ .  $\Delta T_{\text{material}} - \Delta T_{\text{solvent}}$  equals to  $8^{\circ}\text{C}$ .  $I$  is 0.3 mW where the area of the light spot is  $1 \text{ cm}^2$ , and  $A$  is 0.62. Thus, the 1064-nm  $\eta$  value of TTF–TCPDA is calculated as  $\eta = 0.0222 \times 8 / 0.3 / (1 - 10^{-0.62}) = 78 \%$ .

**Table S4.** Summary of previous results of similar TTF–TCPDA or TTF/TCPDA-based NIR photothermal properties in the literature.

| Categories       | Samples                                 | Laser $\lambda_{\text{ex}} / \text{nm}$ | Laser Intensity / $\text{W cm}^{-2}$ | Temperature Range ( $\Delta T / \text{K}$ ) | Time   | Reference                                                          |
|------------------|-----------------------------------------|-----------------------------------------|--------------------------------------|---------------------------------------------|--------|--------------------------------------------------------------------|
| Organic Material | TTF–TCPDA                               | 1064                                    | 0.1                                  | 35                                          | 20 s   | This work                                                          |
|                  | TTF–TCPDA                               | 1064                                    | 0.3                                  | 100                                         | 20 s   | This work                                                          |
|                  | TTF–TCPDA                               | 1064                                    | 0.5                                  | 145                                         | 20 s   | This work                                                          |
|                  | PER-TCNQNP <sup>10</sup>                | 1064                                    | 1                                    | 34                                          | 12 min | <i>Angew. Chem. Int. Ed.</i> <b>2021</b> , <i>60</i> , 11758–11762 |
|                  | 2MPT <sup>2+</sup> –CB[8] <sup>11</sup> | 1064                                    | 0.5                                  | 20                                          | 5 min  | <i>Angew. Chem. Int. Ed.</i> <b>2019</b> , <i>58</i> , 15526–15531 |
|                  | TTF–F4TCNQ <sup>12</sup>                | 1064                                    | 1                                    | 44                                          | 10 min | <i>Adv. Mater.</i> <b>2022</b> , <i>34</i> , 2201706               |
|                  | TMB–F4TCNQ <sup>13</sup>                | 1060                                    | 1                                    | 24                                          | 10 min | <i>Angew. Chem. Int. Ed.</i> <b>2021</b> , <i>60</i> , 8157–8163   |
|                  | TMB–TCNQ <sup>13</sup>                  | 1060                                    | 1                                    | 18                                          | 10 min |                                                                    |
|                  | Py–BPy <sup>2+</sup> COF <sup>14</sup>  | 1064                                    | 1                                    | 65                                          | 5 min  | <i>J. Am. Chem. Soc.</i> <b>2019</b> , <i>141</i> , 14433–14442    |
|                  | H-TTC/LAG <sup>15</sup>                 | 1064                                    | 1                                    | 140                                         | 15 s   |                                                                    |
|                  | H-TTC/LAG <sup>15</sup>                 | 1064                                    | 0.5                                  | 47                                          | 15 s   | <i>CCS Chem.</i> <b>2022</b> , <i>4</i> , 2333–2343                |
|                  | H-TTC/LAG <sup>15</sup>                 | 1064                                    | 0.1                                  | 15                                          | 15 s   |                                                                    |
|                  | BAF4 NPs <sup>16</sup>                  | 1064                                    | 0.75                                 | 35                                          | 15 min | <i>Angew. Chem. Int. Ed.</i> <b>2021</b> , <i>60</i> , 22376–22384 |
|                  | CPDT–T <sup>17</sup>                    | 1064                                    | 0.3                                  | 13                                          | 12 min |                                                                    |
|                  | CPDT–T <sup>17</sup>                    | 1064                                    | 0.5                                  | 19                                          | 12 min | <i>Chem. Commun.</i> <b>2022</b> , <i>58</i> , 6340–6343           |
|                  | CPDT–T <sup>17</sup>                    | 1064                                    | 0.8                                  | 29                                          | 12 min |                                                                    |
|                  | Et-F4 NPs <sup>18</sup>                 | 1064                                    | 0.2                                  | 6                                           | 10 min |                                                                    |

|                    |                                                     |      |      |    |        |                                                                |
|--------------------|-----------------------------------------------------|------|------|----|--------|----------------------------------------------------------------|
|                    | Et-F4 NPs <sup>18</sup>                             | 1064 | 0.6  | 17 | 10 min | <i>J. Mater. Chem. B</i> <b>2021</b> , 9, 8300–8307            |
|                    | Et-F4 NPs <sup>18</sup>                             | 1064 | 1    | 28 | 10 min |                                                                |
|                    | PDPPTBZ NPs <sup>19</sup>                           | 1064 | 0.3  | 18 | 5 min  | <i>Nanoscale</i> <b>2019</b> , 11, 7754–7760                   |
|                    | TBDOPV–DT<br>NPs <sup>20</sup>                      | 1064 | 0.9  | 26 | 10 min | <i>ACS Appl. Mater. Interfaces</i> <b>2018</b> , 10, 7919–7926 |
|                    | P1 NPs <sup>21</sup>                                | 1064 | 1    | 40 | 5 min  | <i>Adv. Mater.</i> <b>2018</b> , 30, 1802591                   |
|                    | Nano-BFF <sup>22</sup>                              | 1064 | 0.5  | 9  | 5 min  |                                                                |
|                    | Nano-BFF <sup>22</sup>                              | 1064 | 1    | 27 | 5 min  | <i>Nat Commun.</i> <b>2021</b> , 12, 218.                      |
|                    | Nano-BFF <sup>22</sup>                              | 1064 | 1.5  | 35 | 5 min  |                                                                |
| Inorganic Material | Au–Cu <sub>9</sub> S <sub>5</sub> NPs <sup>23</sup> | 1064 | 0.5  | 12 | 5 min  |                                                                |
|                    | Au–Cu <sub>9</sub> S <sub>5</sub> NPs <sup>23</sup> | 1064 | 0.6  | 18 | 5 min  | <i>J. Am. Chem. Soc.</i> <b>2014</b> , 136, 15684–15693        |
|                    | Au–Cu <sub>9</sub> S <sub>5</sub> NPs <sup>23</sup> | 1064 | 0.7  | 20 | 5 min  |                                                                |
|                    | Au@Cu <sub>2-x</sub> S <sup>24</sup>                | 1064 | 0.7  | 20 | 10 min | <i>Adv. Mater.</i> <b>2016</b> , 28, 3094–3101                 |
|                    | 2D Nb <sub>2</sub> C NSS <sup>25</sup>              | 1064 | 0.5  | 7  | 5 min  |                                                                |
|                    | 2D Nb <sub>2</sub> C NSS <sup>25</sup>              | 1064 | 1    | 19 | 5 min  | <i>J. Am. Chem. Soc.</i> <b>2017</b> , 139, 16235–16247        |
|                    | 2D Nb <sub>2</sub> C NSS <sup>25</sup>              | 1064 | 1.5  | 35 | 5 min  |                                                                |
|                    | H-SiOxNPs <sup>26</sup>                             | 1064 | 1    | 23 | 20 min | <i>Biomaterials</i> <b>2017</b> , 143, 120–129                 |
|                    | Pt spirals <sup>27</sup>                            | 1064 | 0.2  | 7  | 15 min |                                                                |
|                    | Pt spirals <sup>27</sup>                            | 1064 | 0.6  | 19 | 15 min | <i>Adv. Mater.</i> <b>2019</b> , 31, 1904836                   |
|                    | Pt spirals <sup>27</sup>                            | 1064 | 1.2  | 33 | 15 min |                                                                |
|                    | Fe <sub>2</sub> P <sup>28</sup>                     | 1064 | 0.15 | 15 | 10 min |                                                                |
|                    | Fe <sub>2</sub> P <sup>28</sup>                     | 1064 | 0.3  | 25 | 10 min | <i>Angew. Chem. Int. Ed.</i> <b>2019</b> , 131, 2429–2434      |
|                    | Fe <sub>2</sub> P <sup>28</sup>                     | 1064 | 0.5  | 43 | 10 min |                                                                |

|                  |                                         |      |      |     |        |                                                            |
|------------------|-----------------------------------------|------|------|-----|--------|------------------------------------------------------------|
|                  | Fe <sub>2</sub> P <sup>28</sup>         | 1064 | 0.75 | 50  | 10 min |                                                            |
| <b>TTF-based</b> | Tri-PMDI-TTF <sup>29</sup>              | 808  | 0.7  | 65  | 200 s  | <i>Chem. Commun.</i> <b>2020</b> , 56, 5223–5226           |
|                  | DTC co-crystal <sup>30</sup>            | 808  | 0.7  | 42  | 10 min | <i>Angew. Chem. Int. Ed.</i> <b>2018</b> , 130, 4027–4031  |
|                  | Co-MOF film <sup>31</sup>               | 808  | 0.5  | 134 | 25 s   | <i>Chem. Eur. J.</i> <b>2021</b> , 27, 11050–11055         |
|                  | Zn-MOF <sup>32</sup>                    | 808  | 0.1  | 106 | 24 s   | <i>Inorg. Chem.</i> <b>2022</b> , 61, 3078–3085            |
|                  | Dy–2D-MOF <sup>33</sup>                 | 808  | 0.1  | 34  | 240 s  | <i>Angew. Chem. Int. Ed.</i> <b>2021</b> , 60, 4789–4795   |
|                  | Dy–m-TTFTB <sup>34</sup>                | 808  | 0.1  | 10  | 15 s   |                                                            |
|                  | Dy–m-TTFTB                              | 808  | 0.5  | 42  | 15 s   | <i>Chem. Sci.</i> <b>2022</b> , 13, 1657–1664              |
|                  | Dy–m-TTFTB                              | 808  | 0.7  | 59  | 15 s   |                                                            |
|                  | I <sub>3</sub> -@DymTTFT <sup>34</sup>  | 808  | 0.1  | 32  | 15 s   |                                                            |
|                  | I <sub>3</sub> -@Dy-mTTFT               | 808  | 0.5  | 123 | 15 s   | <i>Chem. Sci.</i> <b>2022</b> , 13, 1657–1664              |
|                  | I <sub>3</sub> -@Dy-mTTFT               | 808  | 0.7  | 175 | 15 s   |                                                            |
|                  | AgNPs@Dy-mTTFTB <sup>34</sup>           | 808  | 0.1  | 32  | 15 s   |                                                            |
|                  | AgNPs@Dy-mTTFTB                         | 808  | 0.5  | 133 | 15 s   | <i>Chem. Sci.</i> <b>2022</b> , 13, 1657–1664              |
|                  | AgNPs@Dy-mTTFTB                         | 808  | 0.7  | 189 | 15 s   |                                                            |
| <b>PDA-based</b> | Zr-PDI•-powder <sup>35</sup>            | 808  | 0.7  | 135 | 10 s   | <i>Nat. Commun.</i> <b>2019</b> , 10, 767.                 |
|                  | Zr-PDI•- film <sup>35</sup>             | 808  | 0.7  | 89  | 100 s  | <i>Nat. Commun.</i> <b>2019</b> , 10, 767.                 |
|                  | BPDI/(CB[7]) <sub>2</sub> <sup>36</sup> | 808  | 1    | 20  | 10 min | <i>Chem. Sci.</i> <b>2015</b> , 6, 3975–3980               |
|                  | CPPDI <sup>37</sup>                     | 808  | 1    | 40  | 30 min | <i>Angew. Chem. Int. Ed.</i> <b>2017</b> , 56, 16239–16242 |
|                  | PPDI-NPs <sup>38</sup>                  | 660  | 0.25 | 16  | 10 min |                                                            |
|                  | PPDI-NPs <sup>38</sup>                  | 660  | 0.75 | 33  | 10 min | <i>Theranostics</i> <b>2020</b> , 10, 1                    |



|  |                                     |     |     |    |        |                                                                  |
|--|-------------------------------------|-----|-----|----|--------|------------------------------------------------------------------|
|  | PBI-[GY] <sub>2</sub> <sup>39</sup> | 808 | 1   | 27 | 15 min |                                                                  |
|  | PBI-[GD] <sub>2</sub> <sup>39</sup> | 808 | 1   | 34 | 15 min | <i>Chem. Commun.</i> <b>2018</b> , <i>54</i> , 2208–2211         |
|  | QDI-NPs <sup>40</sup>               | 808 | 0.1 | 17 | 10 min |                                                                  |
|  | QDI-NPs <sup>40</sup>               | 808 | 0.5 | 24 | 10 min | <i>Angew. Chem. Int. Ed.</i> <b>2019</b> , <i>58</i> , 1638–1642 |
|  | QDI-NPs <sup>40</sup>               | 808 | 1   | 37 | 10 min |                                                                  |
|  | TNMs <sup>41</sup>                  | 660 | 1   | 36 | 10 min | <i>ACS Nano</i> <b>2017</b> , <i>11</i> , 3797–3805              |
|  | PDIHOF(PFC55) <sup>42</sup>         | 980 | 1.5 | 26 | 20 s   |                                                                  |
|  | UCNPs@PFC55 <sup>42</sup>           | 980 | 1.5 | 70 | 20 s   | <i>Angew. Chem. Int. Ed.</i> <b>2021</b> , <i>60</i> , 1–8       |

## 7. References

- 1 A. Ellern, J. Bernstein, J. Y. Becker, S. Zamir, L. Shahal and S. Cohen, *Chem. Mater.*, 1994, **6**, 1378–1385.
- 2 P. J. Stephens, F. J. Devlin, C. F. Chabalowski and M. J. Frisch, *J. Phys. Chem.*, 1994, **98**, 11623–11627.
- 3 S. Grimme, J. Antony, S. Ehrlich and H. Krieg, *J. Chem. Phys.*, 2010, **132**, 154104.
- 4 S. Simon, M. Duran and J. J. Dannenberg, *J. Chem. Phys.*, 1996, **105**, 11024–11031.
- 5 M. Frisch, G. W. Trucks, H. B. Schlegel, G. E. Scuseria, M. A. Robb, J. R. Cheeseman, G. Scalmani, V. Barone, B. Mennucci and G. Petersson, Gaussian, Inc., Wallingford CT, 2009.
- 6 T. Lu and F. Chen, *J. Comput. Chem.*, 2012, **33**, 580–592.
- 7 W. Humphrey, A. Dalke and K. Schulten, *J. Mol. Graph.*, **1996**, *14*, 33–38.
- 8 R. L. Martin, *J. Chem. Phys.*, 2003, **118**, 4775–4777.
- 9 B.-T. Liu, X.-H. Pan, D.-Y. Zhang, R. Wang, J.-Y. Chen, H.-R. Fang and T.-F. Liu, *Angew. Chem. Int. Ed.*, 2021, **60**, 25701–25707.
- 10 S. Tian, H. Bai, S. Li, Y. Xiao, X. Cui, X. Li, J. Tan, Z. Huang, D. Shen, W. Liu, P. Wang, B. Z. Tang and C. S. Lee, *Angew. Chem. Int. Ed.*, 2021, **60**, 11758–11762.
- 11 B. Tang, W.-L. Li, Y. Chang, B. Yuan, Y. Wu, M.-T. Zhang, J.-F. Xu, J. Li and X. Zhang, *Angew. Chem. Int. Ed.*, 2019, **58**, 15526–15531.
- 12 Y. Chen, P. He, D. Jana, D. Wang, M. Wang, P. Yu, W. Zhu and Y. Zhao, *Adv. Mater.*, 2022, **34**, e2201706.
- 13 C. Ou, W. Na, W. Ge, H. Huang, F. Gao, L. Zhong, Y. Zhao and X. Dong, *Angew. Chem. Int. Ed.*, 2021, **60**, 8157–8163.
- 14 Z. Mi, P. Yang, R. Wang, J. Unruangsri, W. Yang, C. Wang and J. Guo, *J. Am. Chem. Soc.*, 2019, **141**, 14433–14442.
- 15 J. Xu, Z. Yin, L. Zhang, Q. Dong, X. Cai, S. Li, Q. Chen, P. Keoingthong, Z. Li, L. Chen, Z. Chen and W. Tan, *CCS Chem.*, 2022, **4**, 2333–2343.

- 16 Z. Jiang, C. Zhang, X. Wang, M. Yan, Z. Ling, Y. Chen and Z. Liu, *Angew. Chem. Int. Ed.*, 2021, **60**, 22376-22384.
- 17 W. Jia, F. Huang, Q. Zhang, L. Zhao, C. Li and Y. Lu, *Chem. Commun.*, 2022, **58**, 6340-6343.
- 18 W. Ge, Y. Xu, C. Liu, W. Xu, Y. Zhang, W. Si, W. Zhao, C. Ou and X. Dong, *J. Mater. Chem. B*, 2021, **9**, 8300-8307.
- 19 Y. Yang, J. Chen, Y. Yang, Z. Xie, L. Song, P. Zhang, C. Liu and J. Liu, *Nanoscale*, 2019, **11**, 7754-7760.
- 20 T. Sun, J.-H. Dou, S. Liu, X. Wang, X. Zheng, Y. Wang, J. Pei and Z. Xie, *ACS Appl. Mater. Interfaces*, 2018, **10**, 7919-7926.
- 21 B. Guo, Z. Sheng, D. Hu, C. Liu, H. Zheng and B. Liu, *Adv. Mater.*, 2018, **30**, e1802591.
- 22 H. Xiang, L. Zhao, L. Yu, H. Chen, C. Wei, Y. Chen and Y. Zhao, *Nat. Commun.*, 2021, **12**, 218.
- 23 X. Ding, C. H. Liow, M. Zhang, R. Huang, C. Li, H. Shen, M. Liu, Y. Zou, N. Gao, Z. Zhang, Y. Li, Q. Wang, S. Li and J. Jiang, *J. Am. Chem. Soc.*, 2014, **136**, 15684-15693.
- 24 M. Ji, M. Xu, W. Zhang, Z. Yang, L. Huang, J. Liu, Y. Zhang, L. Gu, Y. Yu, W. Hao, P. An, L. Zheng, H. Zhu and J. Zhang, *Adv. Mater.*, 2016, **28**, 3094-3101.
- 25 H. Lin, S. Gao, C. Dai, Y. Chen and J. Shi, *J. Am. Chem. Soc.*, 2017, **139**, 16235-16247.
- 26 X. Yu, K. Yang, X. Chen and W. Li, *Biomaterials*, 2017, **143**, 120-129.
- 27 Q. Wang, H. Wang, Y. Yang, L. Jin, Y. Liu, Y. Wang, X. Yan, J. Xu, R. Gao, P. Lei, J. Zhu, Y. Wang, S. Song and H. Zhang, *Adv. Mater.*, 2019, **31**, e1904836.
- 28 Y. Liu, W. Zhen, Y. Wang, J. Liu, L. Jin, T. Zhang, S. Zhang, Y. Zhao, S. Song, C. Li, J. Zhu, Y. Yang and H. Zhang, *Angew. Chem. Int. Ed.*, 2019, **58**, 2407-2412.
- 29 D. Wang, X. Kan, C. Wu, Y. Gong, G. Guo, T. Liang, L. Wang, Z. Li and Y. Zhao, *Chem. Commun.*, 2020, **56**, 5223-5226.
- 30 Y. Wang, W. Zhu, W. Du, X. Liu, X. Zhang, H. Dong and W. Hu, *Angew. Chem. Int. Ed.*, 2018, **57**, 3963-3967.
- 31 T. Yan, Y.-Y. Li, J. Su, H.-Y. Wang and J.-L. Zuo, *Chem. Eur. J.*, 2021, **27**, 11050-11055.
- 32 T. Yan, Y.-Y. Li, Q.-Y. Gu, J. Li, J. Su, H.-Y. Wang and J.-L. Zuo, *Inorg. Chem.*, 2022, **61**, 3078-3085.
- 33 J. Su, N. Xu, R. Murase, Z.-M. Yang, D. M. D'Alessandro, J.-L. Zuo and J. Zhu, *Angew. Chem. Int. Ed.*, 2021, **60**, 4789-4795.
- 34 J. Su, P. Cai, T. Yan, Z.-M. Yang, S. Yuan, J.-L. Zuo, H.-C. Zhou, *Chem. Sci.*, 2022, **13**, 1657-1664.
- 35 B. Lu, Y. Chen, P. Li, B. Wang, K. Mullen, M. Yin, *Nat. Commun.*, 2019, **10**, 767.
- 36 Y. Jiao, K. Liu, G. Wang, Y. Wang, X. Zhang, *Chem. Sci.*, 2015, **6**, 3975-3980.
- 37 Y. Yang, P. He, Y. Wang, H. Bai, S. Wang, J.-F. Xu and X. Zhang, *Angew. Chem. Int. Ed.*, 2017, **56**, 16239-16242.
- 38 J. Li, C. Liu, Y. Hu, C. Ji, S. Li and M. Yin, *Theranostics*, 2020, **10**, 166-178.
- 39 L. Cui, Y. Jiao, A. Wang, L. Zhao, Q. Dong, X. Yan and S. Bai, *Chem. Commun.*, 2018, **54**, 2208-2211.
- 40 C. Liu, S. Zhang, J. Li, J. Wei, K. Müllen and M. Yin, *Angew. Chem. Int. Ed.*, 2019, **58**, 1638-1642.
- 41 S. Zhang, W. Guo, J. Wei, C. Li, X.-J. Liang and M. Yin, *ACS Nano*, 2017, **11**, 3797-3805.
- 42 B.-T. Liu, X.-H. Pan, D.-Y. Zhang, R. Wang, J.-Y. Chen, H.-R. Fang and T.-F. Liu, *Angew. Chem. Int. Ed.*, 2021, **60**, 25701-25707
